# Supplementary material for: 3D Plotting of Calcium Phosphate Cement and Melt Electrowriting of Polycaprolactone Microfibers in One Scaffold: A Hybrid Additive Manufacturing Process
Source: MDPI journal article supplement (doi:10.3390/jfb13020075), 2022-06-08
Supplement: s1 [file s1]

## SUPPLEMENTARY MATERIAL

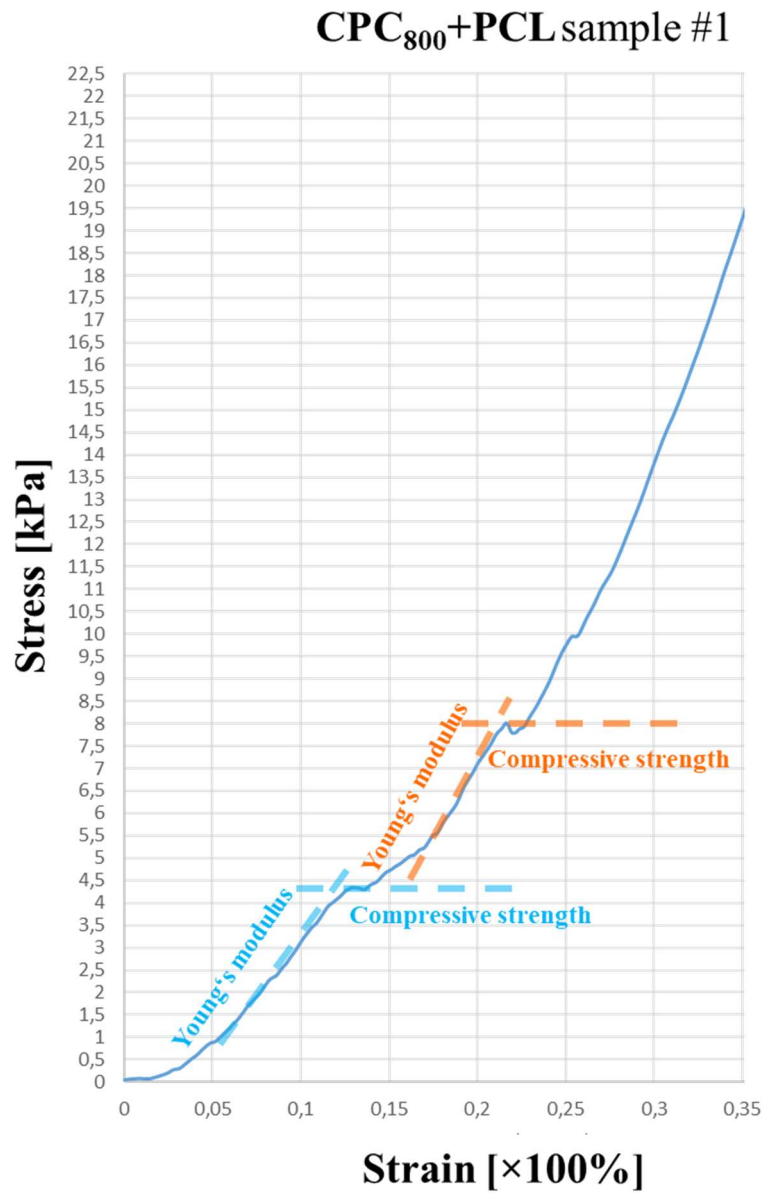

**Figure S1:** Representative stress-strain curve from one CPC<sub>800</sub>+PCL scaffold, with the respective two breaking points for determination of compressive strength and Young's modulus

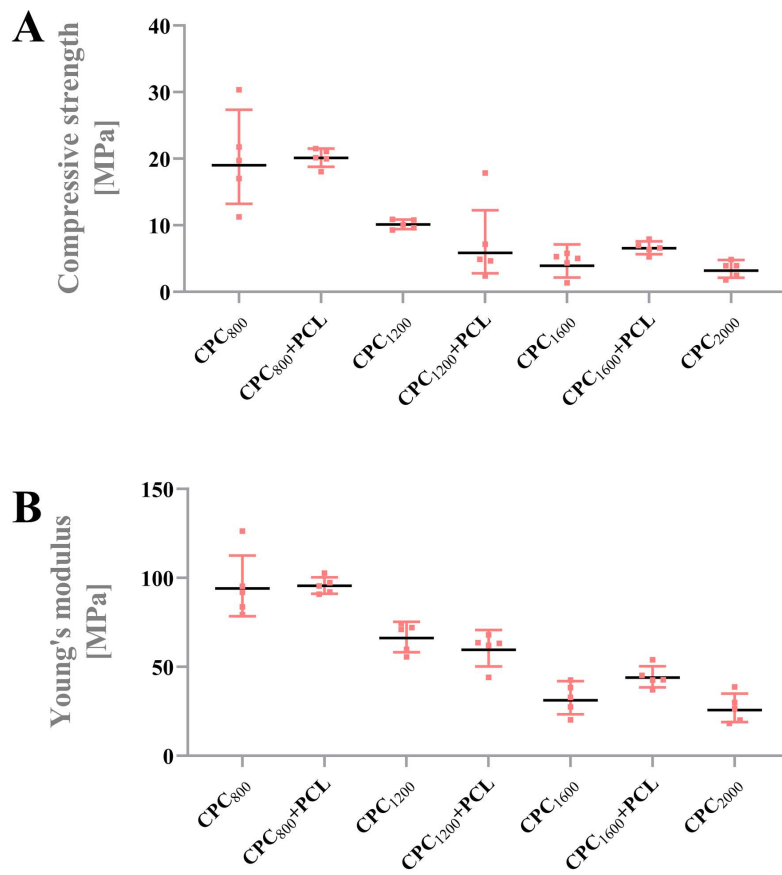

**Figure S2:** Mechanical properties of CPC and CPC+PCL scaffolds with different CPC strand distance (800  $\mu\text{m}$ , 1200  $\mu\text{m}$ , 1600  $\mu\text{m}$ , 2000  $\mu\text{m}$ ), calculated at second breaking point of the stress-strain curve. **A:** Compressive strength of CPC and CPC+PCL scaffolds.  $n = 3$ . **B:** Young's modulus of CPC and CPC+PCL scaffolds.  $n = 5$ .

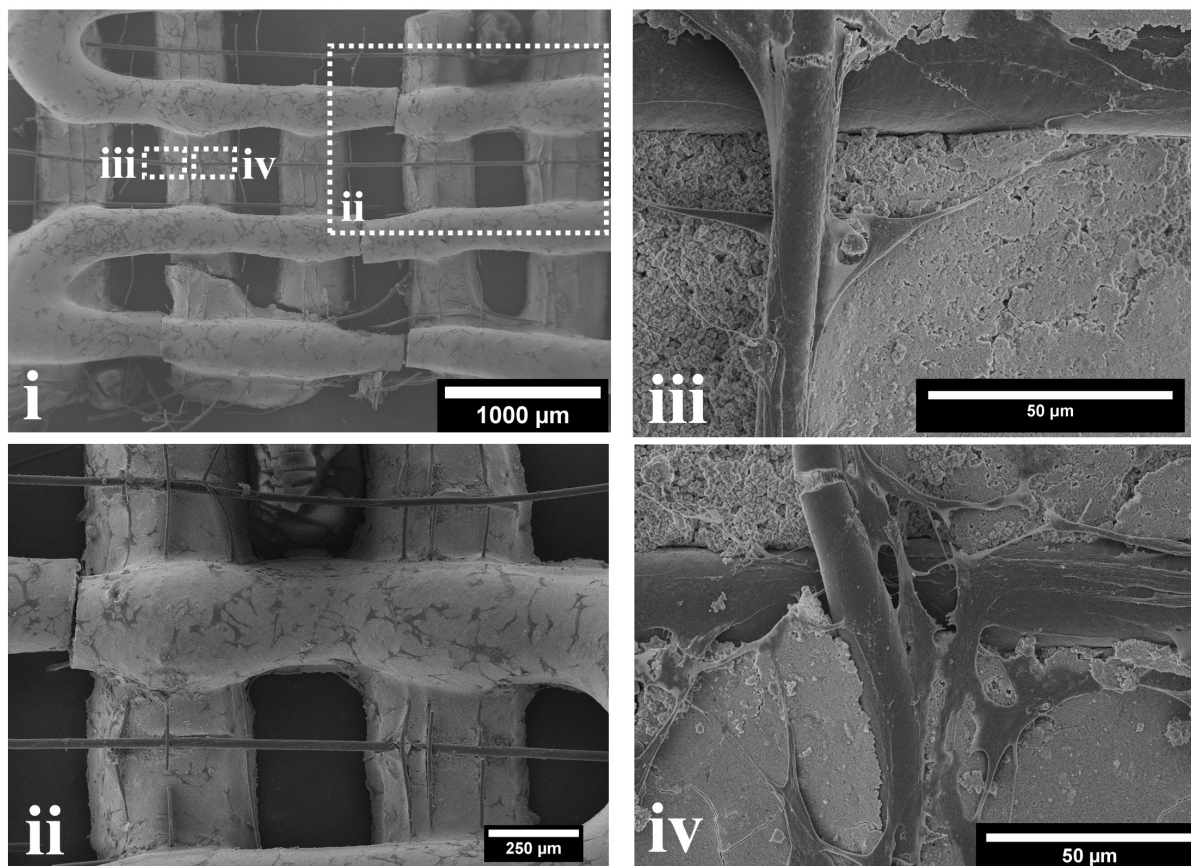

**Figure S3:** SEM images of mOB-seeded hybrid CPC+PCL scaffolds (day 1), overview image (i; scale bar = 1000  $\mu\text{m}$ ), higher magnification images focusing on biphasic interwoven structure (ii; scale bar = 250  $\mu\text{m}$ ) and cell attachment to CPC strands and PCL fibers (iii, iv; scale bar = 50  $\mu\text{m}$ )

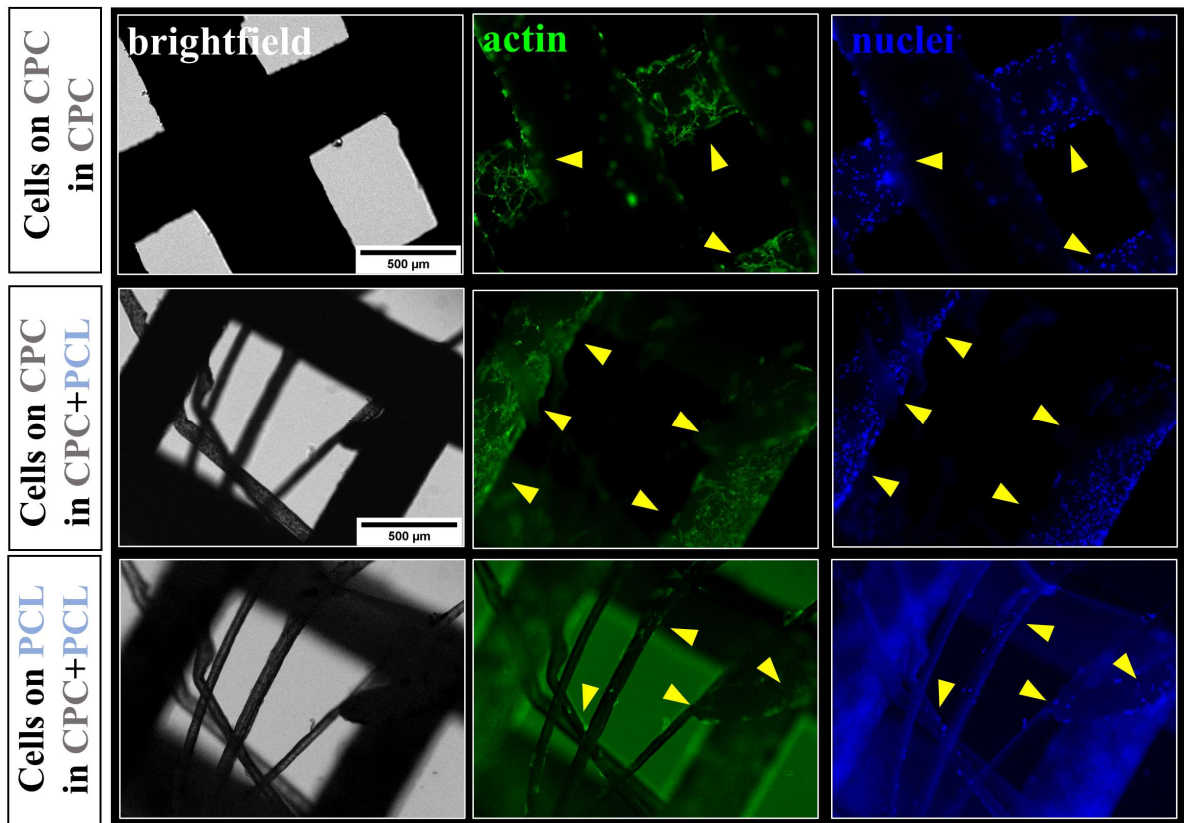

**Figure S4:** MC3T3-E1 attachment (yellow arrows) on CPC and on PCL fibers that were printed or dragged out of the scaffold plane, on day 1 after seeding to CPC in CPC scaffolds (A, upper panel), and cell attachment to both materials CPC (A, middle panel), and PCL fibers (lower panel) in CPC+PCL hybrid scaffolds.

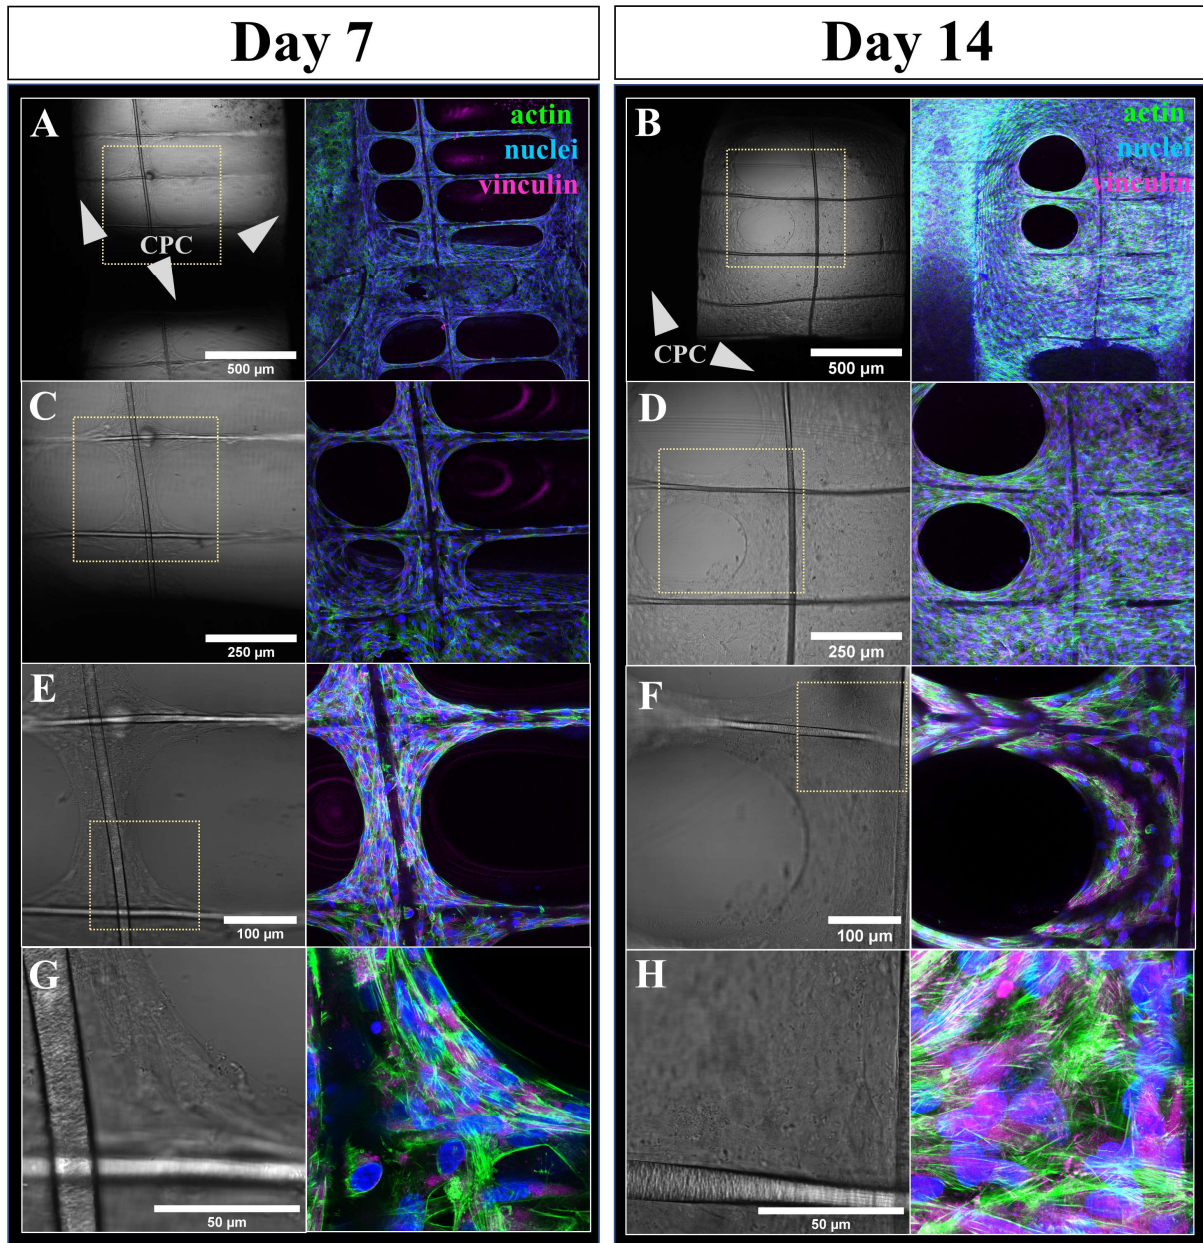

**Figure S5:** A: cLSM fluorescence images of hMSC cell morphology and focal adhesion points on day 7 and 14 of cultivation in CPC<sub>1600</sub>+PCL scaffolds with a CPC strand distance of 1600  $\mu\text{m}$ : cytoskeleton in green (phalloidin), cell nuclei in blue (DAPI), vinculin/focal adhesion points in magenta (anti-vinculin immunostaining), scale bars in A/B represent 500  $\mu\text{m}$ , scale bars in C/D represent 250  $\mu\text{m}$ , scale bars in E/F represent 100  $\mu\text{m}$ , scale bars in G/H represent 50  $\mu\text{m}$ .



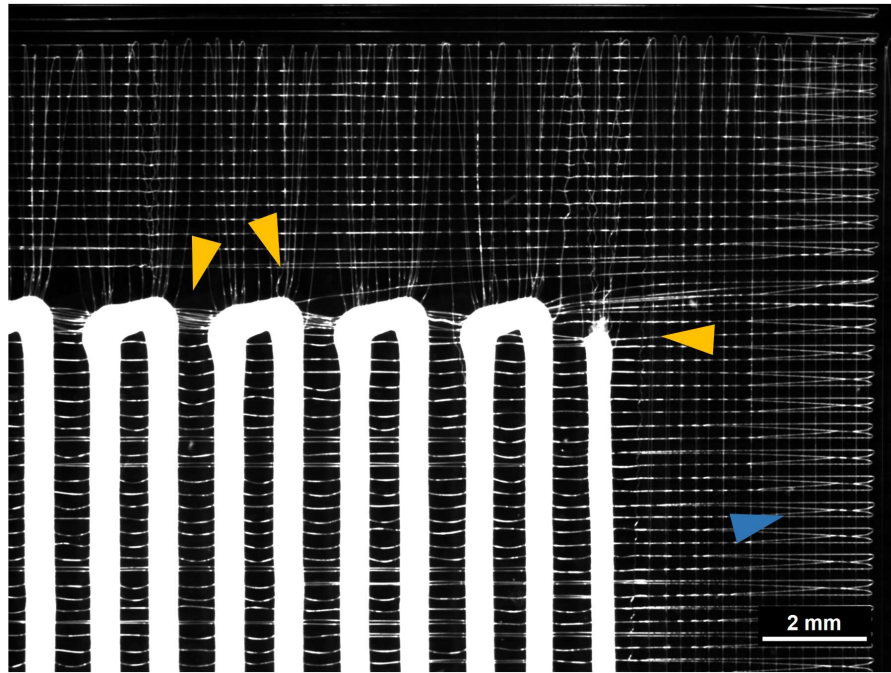

**Figure S6:** Light microscopy image of 1 CPC layer + 4 PCL layers with a 90° PCL-to-CPC-orientation. Yellow arrows indicate fiber accumulation due to a locally increased electrical field strength. Blue arrow indicates regular fiber structure at the outer edges of the PCL scaffold, scale bar = 2 mm.

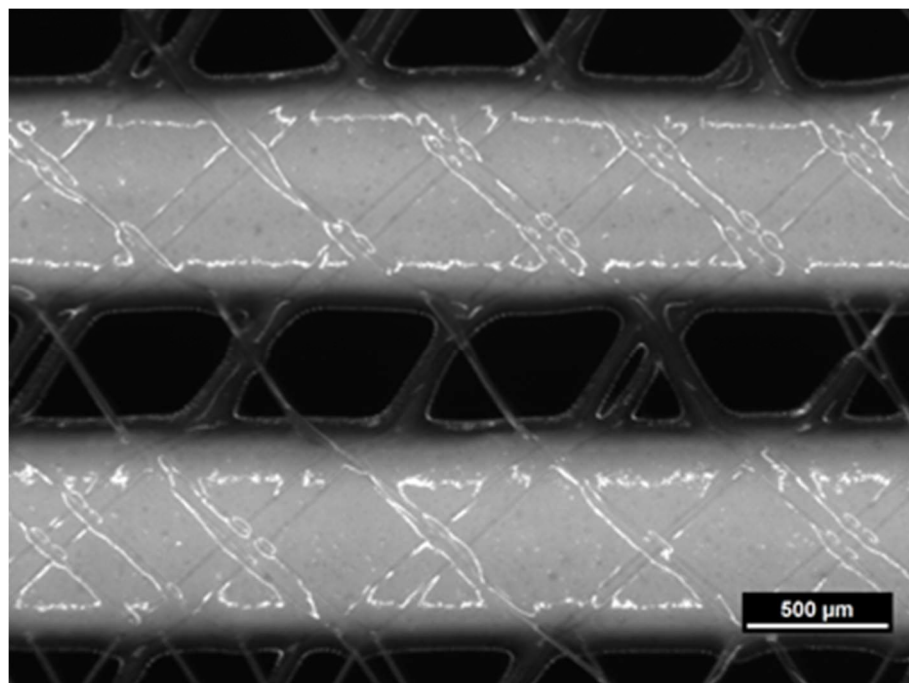

**Figure S7:** Light microscopy image of 1 CPC layer + 2 PCL layers with a 45° PCL-to-CPC-orientation to the CPC which can lead to a reduced level of deflection of the PCL fibers in comparison to PCL fibers printed in parallel to CPC strands, scale bar = 500  $\mu\text{m}$ .
